# Supplementary material for: Effects of solvents on the conformational profile of Balaram's peptide: a computational study
Source: Royal Society of Chemistry journal article supplement (doi:10.1039/d2cp02962f), 2022-01-01

**EFFECT OF THE SOLVENT ON THE  
CONFORMATIONAL PROFILE OF BALARAM'S  
PEPTIDE: A COMPUTATIONAL STUDY**

**Patricia Gomez-Gutierrez, Jaime Rubio-Martinez and Juan J. Perez**

**Supplementary Material**

**1. Size of the boxes used in the simulations**

Chloroform: 40.729 x 45.744 x 50.887 Å

DMSO: 37.359 x 42.333 x 46.669 Å

MeOH: 39.952 x 45.493 x 50.567 Å

Water: 42.177 x 47.306 x 52.717 Å

## 2. Results of the cluster analysis for the different simulations

### 2a. Chloroform

| Cluster | Num. of structures |       |
|---------|--------------------|-------|
| 1       | 589919             | 59%   |
| 2       | 158090             | 15.8% |
| 3       | 87516              | 8.8%  |
| 4       | 135324             | 13.5% |
| 5       | 28189              | 2.8%  |
| 6       | 962                | 0.1%  |

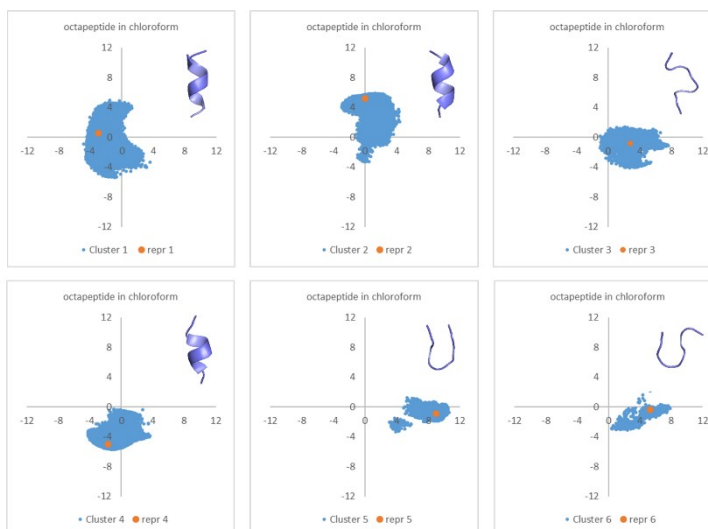

### 2b. DMSO

| Cluster | Num. of structures |       |
|---------|--------------------|-------|
| 1       | 263039             | 26.3% |
| 2       | 249754             | 25%   |
| 3       | 173859             | 17.4% |
| 4       | 174252             | 17.4% |
| 5       | 85486              | 8.5%  |
| 6       | 53610              | 5.4%  |

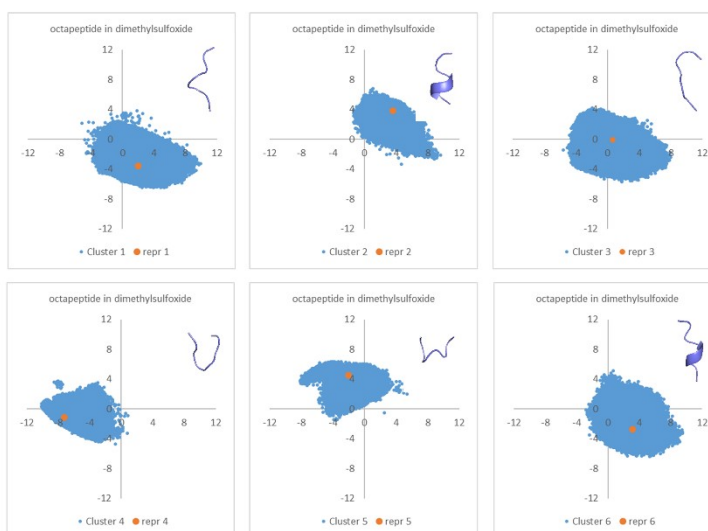

### 2c. MeOH

| Cluster | Num. of structures |      |
|---------|--------------------|------|
| 1       | 607610             | 60%  |
| 2       | 113861             | 11%  |
| 3       | 76084              | 7.6% |
| 4       | 130685             | 13%  |
| 5       | 38023              | 3.8% |
| 6       | 33444              | 3.3% |

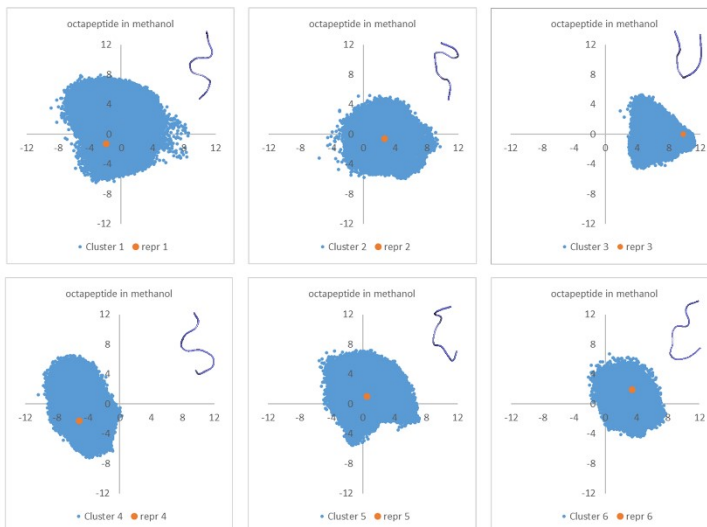

## 2d. Water

| Cluster | Num. of structures |       |
|---------|--------------------|-------|
| 1       | 427034             | 42.7% |
| 2       | 203522             | 20.4% |
| 3       | 190508             | 19%   |
| 4       | 122268             | 12.2% |
| 5       | 26042              | 2.6%  |
| 6       | 30626              | 3.1%  |

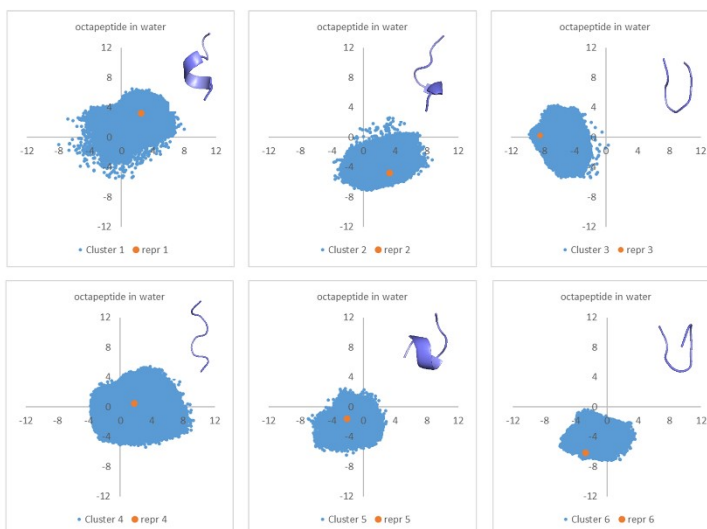

Supplement: d2cp02962f1.pdf [file d2cp02962f1.pdf]
